# Supplementary material
Source: publisher figshare collection journal article supplement (https://geolsoc.figshare.com/ndownloader/files/8500673)
Supplement: Supplementary file 1 [file 8500673]

**P-T METAMORPHIC EVOLUTION MODELLING - Methodology**

Structural f­ormulae for all analysed minerals were obtained with the A-X tool of the THERMOCALC software (Holland & Powell 1998 v. 3.33 as of 2016). The amount of Fe2+ and Fe3+ was obtained by charge balance, assuming that Fe is the only variable charge element for all minerals. Mineral chemistry of the analysed minerals is summarized in Appendix B.

P-T estimates were obtained using the THERMOCALC software (Holland & Powell 1998 v. 3.33 as of 2016) that uses an internally-consistent thermodynamic database. Activities for the relevant mineral phases (garnet, amphibole, clinopyroxene, plagioclase and quartz) were calculated with the A-X tool (Holland & Powell 1998). Average P-T calculations obtained with THERMOCALC make use of a wide set of independent reactions involving all end-members of the referred mineral assemblage (Worley & Powell 2000). Standard deviation for reactions controlling the temperature outputs given by THERMOCALC are ca. 50 ⁰C, whereas for pressure estimates, the standard deviation ranges between 1.0 to 1.5 kbar (e.g. Hodges & Crowley 1985). Standard methodological procedures involving the rationale for P-T calculations can be found in Spear & Florence (1992), Bento dos Santos *et al.* (2011) and Jesus *et al.* (2016).

**References**

Bento dos Santos, T., Munhá, J.M.U., Tassinari, C.C.G., Fonseca, P.E. & Dias Neto, C.M. 2011. Metamorphic P-T evolution of granulites in central Ribeira Fold Belt, SE Brazil. *Geosciences Journal*, **15** (1), 27-51.

Hodges, K.V. & Crowley, P.D. 1985. Error estimation and empirical geothermobarometry for pelitic systems. *American Mineralogist*, **70**, 702-709.

Holland, T.J.B. & Powell, R. 1998. An internally-consistent thermodynamic dataset for phases of petrological interest. *Journal of Metamorphic Geology*, **16**, 309–344.

Jesus, A.P., Mateus, A., Munhá, J.M., Tassinari, C.C.G., Bento dos Santos, T. & Benoit, M. 2016. Evidence for underplating in the genesis of the Variscan synorogenic Beja Layered Gabbroic Sequence (Portugal) and related mesocratic rocks. *Tectonophysics*, **683**, 148-171.

Spear, F. & Florence, F. 1992. Thermobarometry in granulites: Pitfalls and new approach. *Precambrian Research*, **55**, 209-241.

Worley, B. & Powell, R. 2000. High-precision relative thermobarometry: theory and a worked example. *Journal of Metamorphic Geology*, **18**, 91–101. doi:10.1046/j.1525-1314.2000.00239.x
